# Supplementary material for: Genome position and gene amplification
Source: PubMed Central journal article supplement (PMC2394771; doi:10.1186/gb-2007-8-6-r120), 2007-06-21
Supplement: gb-2007-8-6-r120-S1.pdf [file gb-2007-8-6-r120-S1.pdf]

## Mapping and Sequencing of DHFR\* Insertion Sites

**Figure 1.**

**A**

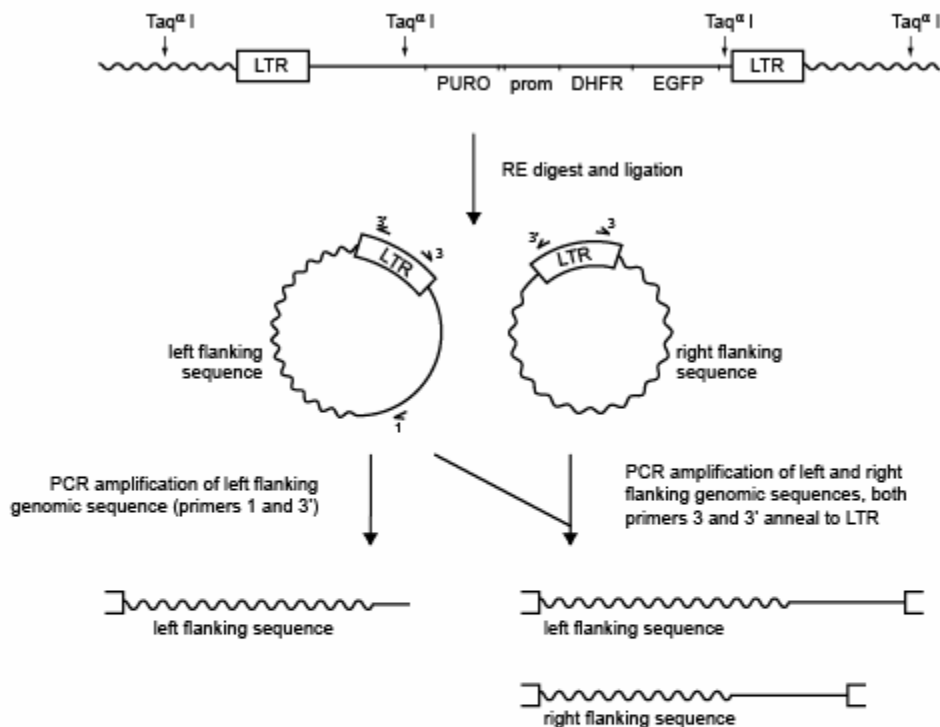

**B**

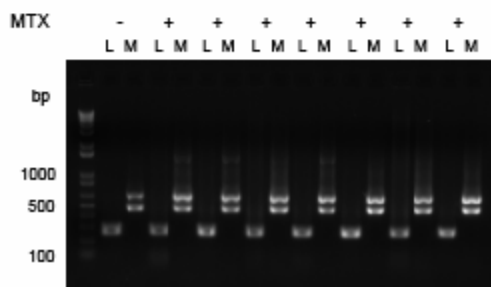

**Figure 1.** Mapping *DHFR\** insertion sites by inverse PCR. **(A)** Inverse PCR schema. Inverse PCR was performed as described previously (Li et al., 1999, Kim et al., 2003) with slight modification. DNA (~3 $\mu$ g) was digested to completion with 60 U of *Taq* <sub>$\alpha$</sub>  I restriction enzyme (NEB) overnight in a 40  $\mu$ l reaction volume. After heat inactivation at 80 $^{\circ}$  C for 20 min, the DNA was diluted to 200  $\mu$ l, circularized by incubation with 1000 U of T4 DNA ligase (high concentration, NEB) at 16 $^{\circ}$  C overnight. The DNA was precipitated with ethanol and re-suspended in 30  $\mu$ l of water. Primary PCR was performed in two 25  $\mu$ l reactions, each with 1.5  $\mu$ l of the DNA template, 1x Expand Buffer 1, 350  $\mu$ M of each dNTP, 10 pmol of each primer, and 1.3 U of Expand Long Template Polymerase (Roche). The primers used were *Taq*<sub>1</sub>, *Taq*<sub>3'</sub> for amplification of genomic DNA flanking the left LTR (left PCR, L) and *Taq*<sub>3</sub> and *Taq*<sub>3'</sub> for amplification of

genomic DNA flanking both LTRs (mixed PCR, M). The plasmid sequence prohibited design of primers which would amplify only the right flanking sequence. Therefore, in the mixed PCR in addition to the band containing the right flanking genomic DNA an additional band was detected with genomic DNA flanking the left LTR (~365 bp longer PCR product than in the left PCR). The cycling conditions were 94° C for 4 min, followed by 35 cycles of 94° C for 30s, 55° C for 1 min, and 68° C for 4 min and a final extension for 10 min. The amount of primary PCR was determined semi-quantitatively by electrophoresis on a 1% agarose gel. **(B)** Left (L) and mixed (M) inverse PCR products for untreated integration site clone 1M-89 (-) and its methotrexate resistant colonies (+) following separation by gel electrophoresis. Clones were considered to have a single copy of *DHFR\** integrated in the genome if they met the following criteria. First, the left inverse PCR reaction yielded a product that mapped to an exact position in the genome. Second, this integration site matched the position in the genome of all mixed inverse PCR products (see Supplementary Figure 2 for sequencing data). Third, the presence of *DHFR\** was confirmed by sequencing of *DHFR\** amplified by PCR from the genomic DNA isolated from individual clones (data not shown).

Figure 2.

1M-34 (left)

1 TTGCCAACCT ACAGGTGGGG TCTTTCACTC CTGCCTCACC CTCCCAGGTA GCTGAGATTA  
61 CAGGCACCCA CCACCGCGCC TGGCTAATTT TTGTACTTTT AGTAGAGACG GGATTTCACC  
121 ATGTTGGCCA GGCTGGTTTT GAACTCCTGG CCTCAAGTGA TCTGCCCTCC TCAGGCTCCC  
181 ACAGTGCTAG GATTGCAGGC ATGAGCCACT GTGCCAGCT GTTGGTTGTT AATTATTTTT  
241 GTTTTTTGTAG ACGGAGTTTA GTCCTGTGG CCCAGCTGGA GTGTAGTGGC ACGGTCTCGG  
301 CTCACTGCAA CCTTCATCTC CCAGGTTTACC ACCATTCTCC TGCCTCAACG TCCCGAGTAG  
361 CTGGGATTAC AGGCACCTGC CACCATGCCC AGCTAATTTT TTGTATTTTT AGTAGAGACA  
421 GGGTTTACC ATGTTGGCCA GGCTGGTC TCGA CTCCCTTC CTCAGGTCGG GCCACAAAA  
481 CGGCCCCCAA AGTCCCTGGG ACGTCTCCA GGGTTGCGGC CGGGTGTCA GAACTCGTCA  
541 GTTCCACCAC GGGTCCGCCA GAACGAANN NTAGTTNAGA A

1M-39 (left)

1 GNAACCTCAG GTGGGGTCTT TCA GTTTGAT TCAAAGTCAT TGGTTCTCTT AGAGAAGGAG  
61 GTCAGACCAG TTTAAGGAAC AAGGAGCAGG AGAAGAGCAA TTGAAGCCTG CACGTAGGAA  
121 CTCAGATGAT AAAATCGTTT TGGAAAATAA TGAACAAGTA ACTTGAGAGC TTGTCTTGAG  
181 GGTGGTATCA CAGGTTAGGC CAGGTTATTA ATTTTCCTAC TCAGCAGTAT GCCTCTTAAA  
241 AAACACTTAC AGGGAATGG ATATGTTTTT GAAAGAAATG CAATTGGCAG AAGGGAATGA  
301 CGGAACCTGCA TGGAGTCCAC AGGCCAGTGG ACCTGGGAGA GCAAACTAC TTCCATGTAA  
361 ATAAGAATTG CATAACTGAG AAAATACCCA AAAGATACAG CTAACAGGAC AGTGTTTAGT  
421 ACACCAAAGT CGA CTCCCTT CCTCAGTTCG GCCACAAAA ACGGCCCCA AAGTCCCTGG  
481 GACGTCTCCC AGGGTTCGG CCGGGTGTTC AGAACTCGTC AGTTCACCA CGGGTCCGCC  
541 AGATACAGAG CTAGTTAGCT AACTAGTACA GACGCAGGCC AAATNNNNAA AAAATNATGG

1M-39 (right)

1 TGTCTTGGG AGGGTCTCCT CTGAGTGATT GACTACCCAC GCACGGGGGT CTTCAAAAAC  
61 CCAACCTGAC AAGATAAATA TGAGGAAGAA AAACAAAAGA GNCAGGGTC TGAATAATAC  
121 CTTTTACNGG INTGCANATT ATCACAGGGT TACCTATTN NGCNCTCNGC ATATTCCAAT  
181 CACCAAAAGG CNTGCTGGA AAAANCAAAT TGGCCATGCA NTAATGCTTN CCNATTTAAA  
241 GTATNATTTT GCCAATCCNG TCNCTTTTA NCTAACNATG AAAAAAANN CAAAACACTT  
301 TTATGATTAC ANTGAANCCC TCTGNNTGTG CAGGATNANC AATNCCTTNC NNAANAANAT  
361 AAAATTTTNT ATNNNCNCCN GAAAAAANGG GGCCAANAAT AACCCCCC

1M-42 (left)

1 GCAACCTACA GGTGGGGTCT TTCAGGTAGA TTGGGATGAG GATTAAGAT AATGCATGCA  
61 AAATATTTGG CACGTAGCAG GTGCTACCAA ATGCTTATG TTGTTGTTAT TACGGAGTTC  
121 AGAGCCCTTT GAGATGCTCC ACAAGTGTGTT GCTGATTGA GGGTGGCACA AAAGGCAGTT  
181 TTCCCAAACA CCAATTGAAA GACTCCTTGG AGTGTGAATT TCAAGATGGT GGGGTACAGC  
241 AATTTCTACC CTCTCG TCGA CTCCCTCCT CAGGTGCGGC CACAAAAACG GCCCCCAAAG  
301 TCCCTGGGAC GTCTCCAGG GTTGCAGCCG GGTGTTTACA ACTCGTCAGT TCCACCACGG  
361 GTCCGCCAGA TACAGAGCTA GTTAGCTAAC TAGTACAGAC GCAGGCGCAA ATNCCNAAAA  
421 AAATAGAA

1M-42 (right)

1 TNNCTTGGGA GGGTCTCCTC TGANTGATTG ACTACCCGTC AGCGGGGGTC TTCAATACCA  
61 AGGGGGGATT ATCCGTATTT TACAGATGAG GAGACTGCAG GCCCAGCAAG GTAAAAATTG  
121 TTGTCCAGC TTTATCCTCT ATTGTATAAG TGCCAGAATT TGAATCCAGG TCTTTCTGGC  
181 CCCAAGTTGC CTATGGCAAC CAAAGCCTTC CACGTCTACC TCCAGTCACT CAGTGGGTGG  
241 CCTTCTCAA ATCTGGTTC ATCAGTCATG TCCAACACAC CGGCATGCAT CCGTGCTTAA  
301 AAAGGGAAGC CAGGCAAAAT AAGTTCCTT GGTATGCCTG TGGCCCCGTT TCCTGGTCTC  
361 ATCTGCCGT CTTTCAAGGT GAGCCTTCCA GGTAAGGGGG CTGGGCTGG AATCCGCAAC  
421 ATGCAGTCAG GAGCTGATTT TCAAAGAACC CGGTGCAGCA NGAAGACCAA GGAGACAGCC  
481 GCCTCCCCTG TCGA TAAAA TAAAAGATTT TATTTAGTCT CCAGAAAAAG GGGGGAATGA  
541 AAGACCCAC CTGTAGGTTT GGCAAGCTAG CTAANTAAC GNTTTTTTN GNCANGGNA  
601 AGNCTAGCTT AAGTAACGCC TTTTTNNCA AGGNA

1M-43 (left)

1 GCAACCTACA GGTGGGGTCT TTCATCCTC CCCTTCTCCC CGCAACCCCT CTGGCCTCCA  
61 ATCAGGCCCC TGCTCCGCGG CTGGCGCTCA CCCGCAACTT CAGTTCCCGT AACGGTCTCT  
121 CCCGCCACC GGCCGCTCCT GCGGATACCT CAAGCCACTA GAACCTTCTT CCACTCCGC  
181 TTCCGGGTGC CTTCAAGAGC CGCCTTAAA AAAGAAACAT TCCACGTTGG GCACTTCTAG  
241 CCAGTTAGAG CTATAGAGTT GAGGCGCCCC GGACC TCGA CTCCCTCCTC AGGTCCGGCC  
301 AAAAAACCG CCCCCAAAGT CCCTGGGACG TCTCCAGGG TTGCGGCCG GTGTTCAGAA  
361 CTCGTAGTT CCACCACGGG TCCGCCAGAT ACAGAGCTAG TTAGCTAACT AGTACAGACG  
421 CAGGCGCAAA

1M-45 (left)

1 GNAACCTCAG GTGGGGTCTT TCAGCCCTAAG GCCCATAATT TTAGAAGAAG CAGGATTTGA  
61 ATTCAGACAC CCTGGCATCT GGGTTCTGGG CCATTCACA ATACTCCAGA TGCACCACAG  
121 TATCAGTCTCT CTGAACGATG ACGAAAGAAA GCATGGGTGT CCAGGCCCA CCCTCTCAGT  
181 CCTCACATCC TCCCTCCATG CCTGATGTGC CCGGGGCTTG CCCAGGGAAG ATCAGAGAGA  
241 GAGCACCGCT CCCCACTCCC TCAACCCAGG TACCCGCCTG GCCTGGCCTG TGGTGCCAGG  
301 ACAGAGCAAA GTTCTCCAGC CTCCCCCAGC CCCGCCAAC TCCAGTCCGT TACTTCTCA  
361 CCAATCCTTG TCCCTGCCGG TCAGAGGAGG GCACAAGGCT AGTCACCAG ACAACAGCAC  
421 AGAGCCCCTG CCAAGAGTTA CCACGGGCTC GTGAGAGGCC CCAGGTGGGG GTCAAAGGTC  
481 AAGTGGGACT CACCGGTGAG GGTGGAGTCC CAGCCCTGCC CCCACCCACC TGTTACGCCA  
541 CACCTGGCCA ATGCTCCCA TCTCTTTCAT TCCTCAGTAG AGAGCAGGAC CACTTCTTG  
601 GTGTCCCTTG GGGGGTGGCT TCAGTGGAGA GGTTCGGGGC TGANGTGAAG GGGGGAATNA  
661 GAAACCCCT CCCTCCCTGG GGATGGTCTA GGAGAAGTGC CTCCTCCAG TCCCAGCTT  
721 CCTCCAGT

1M-45 (right)

1 NCTGTTCTTG GGAGGGTCTC CTCTGAGTGA TTGACTACCC ACGACGGGGG TCTTTCAAGG  
61 CGAGTTATTT AACTTCTCGG CATGTCCCTT TTCTTAGTGG GAAAGTGAGG ATAATAAGAA  
121 TACTTTCTTA CCAGATTGTT CTGAGGATTA AACTA NACTA TAAGATTTA TTTTTCTNC  
181 AGACTCCGGN GGNAGGGNGG AANGNCACAN NNAACCTGT A

1M-57 (left)

1 GCAACCTACA GGTGGGGTCT TTCA CAAGTA TTCATAAAAT CCAGGGCTCT TACTTAGTAT  
61 TTCTTAGTTC CTGTGGTAGG CTGACCCTTT AATCTTGGT GGAGTTTCA TAATTAATGC  
121 TTTGAAAATAT TTTGGTGAGC TCAAGTTGTA TCTTAGGGAT CAAAGATGTG GGTCTAATCT  
181 CTTACCAGAA ATGAT TCGAC TCCCTTCTC AGGTCCGGCC AAAAAACCG CCCCCAAGT  
241 CCCTGGGACG TCTCCAGGG TTGCGGCCGG GTGTTCAGAA CTCGTAGTT CCACCACGGG  
301 TCCGCCAGAT ACAGAGCTAG TTAGCTAACT AGTACAGACG CAGGCGCATA CTTTCNAAA  
361 AAATAGAA

1M-67 (left)

1 GCNACCTACA GGTGGGGTCT TTCAATGCTA GCTATCCAAT CACACCAGCT CTCTGCATTC  
61 TTAACAGAGG GTCCTTTGTT CCAAACAGTA AGGCTCAAAA GAAACATAGT CTGATAAAAT  
121 CACACTGAGA TCAGTACTCC CAGCTGGTGC AAGGGCTGAT GCCATTCCAT AACACACCCT  
181 ACAGGAAGCA GCCTGAGATA CACAGCTGAT TGATTCCAC AGCAGGAGCC TTGTGGCAGT  
241 GTGGGGTGGG GACTGGTCA GATAGAGAA AATTCTCAG TCGCTGACTC AGATTAGTTC  
301 CCCAAGATCC TGACTCTATC TGTGTAAGTC ACTCCCGAA GCAACACTAT TTCTAACTA  
361 ATTTTCTTAA AAGGAGAGGA AAACACAGA AGCACCCTCA GCGAGTGGAA CTATTTAATC  
421 AGTTAACTCT TACTTGTCA TGGATCTGAA GATGGCAAAA ATCAAATTCC CTAGCTTCT  
481 AGAAGTAAGC TGAATAATTC TTTCATTGTA AGGGGCCGTC ATCCTGTGTA TTGTAGGTTG  
541 TTTCCGAGCA CTACTAGAT GCCAGTAGCA GCTTTTCCAG TCATAACAAT AAAAAATGTC  
601 TCTGGGCCAG GCACTGTGGC TCATTCTGT AATACCAGCA CTCTGAGAGG CTGAGGTAGG  
661 CAGATCATT GAGCTCAGGA GTTCAAGGCC GGCCTGGCA ACATGGTGAA ACTCTATCT  
721 TACAAAAAAT AAAAAATTA GCCAGGAATG

1M-67 (right)

1 GGGAGGGTCT CCTCTGAGTG ATTGACTACC CACGACGGGG GTCTTTCAGC ATATACATAC  
61 ATGGTTCTTA TGGGAAAAAA ACAGACATAA ATTATGCTAT AGCCCTCTAA AATTTTCATC  
121 TCCAAAATGA TTTCTGACC TTCTGTCTGT ATTCACAGTT CTTTCTGTAA GTGCTTATCC  
181 TTCCCCAAA GCAAT TCGAT AAAATAAAAG ATTTTATTTA GTCTCCAGAA AAAGGGGGGA  
241 ATGAAAGACN CCNACCTGTA

1M-72 (right)

1 TNNGTCTTG GGAGGGTCTC CTCTGANTGA TTGACTACCC ACGACGGGGG TCTGCATCCA  
61 GAAGTCTAAA TTTGGATTCA CCTTATTGTC AGGGATGTGA AAGCCTCCCT TTCTCCCTCA  
121 AAAACAAAAC AAGGATTGCT GTAATGCAGT ATTTTGACA TAAACGTTCA AACCTTTATC  
181 AAACAAAAAT CCCTCGCAGA ACAAGTAGAA TGGTATTAGA TGCACAGACA TCTTGGGAGT  
241 TGGTGCAGAA ACATCAGTAG AAAAACTGA TGAATCATT TCCACAAAAG CAGGTTTGGC  
301 TTAGGCTGGG GGCCTCTGT CAAATGATTA TTTACCCAT TAACGTTTAA GCGGTTTCT  
361 TTAAATGAAA AACGTCTCAC AAAATCTGAA GTTACCATCA ACCTTTTAT CTAAAACTC  
421 ATAATCAACG GTATGAGTAA TTCCAATGC CCACCAGC ACGGCTTATA AAATACCTTG  
481 AAGTCAGGC TCACCTGGGT AAGAAACCTG CCCTCCCTCT CCTCTACCA GAGACTTTGC  
541 CTTACTTACT TTGCCACAGA AAGAGCAAGT GFACTTGGCG TGCTGGCTGA TTTCAATTT  
601 CTTACCATT TTCCGGAGGG AGGCCATA GCGGGTCCC TATTACCGA CGATCCCGAC  
661 TTTCTGGTA CGTTTGGCT GTTTAGAGTG AAGGGAGAAA CCAGTGATAG ACCTGGNAAC  
721 CCAGGCAGGC CCTGGAGCC

1M-73 (left)

1 CNGCTGCCAA CCTACAGGTG GGGTCTTTCA CAGTTTTTAC CTAAGGAAAA AAGTATAAGA  
61 CAAGACATTT TAAAGTCAGA TFACTAAAAAT GATTCTGTGA ATTCCACATT CTCAAGAAAA  
121 AATGTGTTTA AGGTGTAATA GTAAATCTT ATAGGACTTA TCTAGTAAG TGGGTAATG

181 GTAAAAATCT AAATTTGGGT TAAATTTTT CGCTCAAATA CCTACATTTC CTTTATCGTA  
241 CCCCCAAAAGG AGCTCTCAAA GAGTAGTTTG AACAGTTTTT GACCCGAAGA TTTTTTTTTT  
301 TTNNANNNGG TNGNACNCTN CGGNTNCCGG NANGGAAAAA AAAGGCCCTT NAGGGGNGGG  
361 NNNACTNNTT TCAGGTNGGT NTTATTTNAA NGAAAAANNA ANGGNGTTT GGGATTTTGT  
421 TNNAAACNCN CANCCAAAAG GGTTTTNCNA CNCCCNCCN CNGGNNGGC CANAAAAANG  
481 GCCCCNAAAG CCCNGGGNAN NNCCCCNNG GTNGNGNCNG GGGGTNAAA ACNCGNCANT  
541 NCCCCNNGG GCCCCCAAC GNAANNNTT TTNTNGAAA

1M-73 (right)

1 GGGAGGGTCT CCTCTGAGTG ATTGACTACC CACGACGGGG GTCTTTCAAC TGTATATCTG  
61 CTGTATGGCT ATGGAGACTC AAAATCCTCA GATTTGGTTA CTTACATTAG CCAGTTTTTG  
121 GTTGTGTAGA TTATAACAAG GAAATACCCC GTTCTAAAT ATAGAAATTG AAAGAATTTT  
181 TGTATGACCA GTTAAATTTT AAAAATAGCT ACGTAGAGTG CACACCAATT TCTTAAAGGGC  
241 CCATATGTTT GAATATTTTA AACAAGATTT ATACATTAGA TGGTCCAAAC AATTGCTTTA  
301 ATTCTCACA CTCTCATGT GTAATAACAG AATTTAGAGA AGTCACCATG TTACTTTTAT  
361 TTTCAATCCT GCAAATGTGT CAGTGTACAC TTATGTAAGG ATTCTTTGGT TTTGACACAT  
421 TCATATCCTA GAAGACATAA ATATTTTAT TAATGCAGAC TTTTGACAAC CTTATTCATA  
481 TGAAAATGTA GCTTTTCCAT TTTACCTTC TAAAGTTTG TCCTCCACA CAGAGCTAAG  
541 TGGAAAATAG TAACCTGCTAA CTACATTCGG ACTACATAAA ACATCATCTG AGTTGTGGG  
601 CTGAATTACC TAGGTATTTG CCACTTCACA TTTACATTG TGTAATATG ACTAGAATGC  
661 CAGGTCAAAT ACCTGTGTTG GTAAAGCACA TTACAATTTG ACTCAATGAA TAGCTATGGA  
721 AGTTTTCTTT ATTGGATTAC TTAATGTGTA ACAATAAT

1M-75 (left)

1 NGCTTGCCAA CCTACAGGTG GGGTCTTTCA GGTAAAGGG CAGAGGAGAG AGCTCTGGAC  
61 ATGGTGCTG GAAGGAGGCC TGGATTTGAA TCCTGGCTGT TGGGACCCT GGAGGGGTCA  
121 GTCATCTGGG AGTTTGTAGT CCTGGATTCC CAAGGGACCC TCAAGTTCTC TTTTCCCAG  
181 AGCAGTACAG GGGACCCAGC CCATGAAGAC CTCGGTTTCC TTCTGATGGA GAGGTGGTTT  
241 CTGTATAGGA GGCTCCAGCG TGTGTGGTCA GTCAAGTTCA AGGCCCTGT GCTTTTGCCC  
301 TTGGGCCAGT GCAGGACTTG ACTGCACTGT GCCTCACTCA CTGTGTAATA TGGATCTAAT  
361 TATGGGATCA CTGTGGCGAG AAAGGAAAAA TATAGGTAAT ATCCTTGCAC AGAGCCTGGC  
421 ATGAGAGGGA AAGGGGCTCG ACTCCCTTC TCAGGTCTGG CCACAAAAAC GGCCCCAAA  
481 GTCCTTGGA CGTCTCCAG GGTGCGGCC GGTGTTCAG AACTCGTCAG TTCCACCAG  
541 GGTCCGCCAA NGAAANNTNT TTNNTTAAAA

1M-75 (right)

1 TGGGAGGGTC TCCTCTGAGT GATTGACTAC CCACGACGGG GGTCTTTCA T AACCTTTGA  
61 TGCTTTTTAA ACCCTCATAT GTCCACATGA CACTTTCGCA TCCGTTCTCT CCTGCTTAGC  
121 CTCAACATCC TCAGAGAGAT GTTCGGGGCT TATCTCACC TGTCCATTGC ATAGAAGGGC  
181 AAAGTGGGC CTGGAGCGTG TGTGGGCCAC CAGATCTCCC CCTGACCCAC AAGGGAGTGA  
241 GTGATATTTG CTTTGGTGGG GGATAAATTT GGAGGCTGGC CTCTACCCC GGCCCTGCCC  
301 CTGGGAGAAG CCTACCCTGG TCTGTGCTG CACACGCCG TCCGGATCTG GAAGTTTGG  
361 CAGGTCTTCA GTGGGACACC ATCGTCTTCC GGGCCAGGCC CCCTCTGCTT CCCTCTCCTG  
421 CTGGATCTTC TCTGGAGTCG GCTCTCACC CCGCCCCAA CTGACTTCC CTGCCAGAGC  
481 TGGGTGGCCC TGACGCTACC CCCACTTCCA CCCCCACCT CCAGTTGAAG GGCTGGGGG  
541 AGTAGGTGCA GAGGGCCCTG GGTTCACC CAGTCTGTGC CTGACACAGG TTGGGGCAGG  
601 GTCTTGGGAG CCAAGGGGAG AAGCAGGGCC GGGGTGTGGG GAGGGGGCGT CCTTGTGCC  
661 GATGCCCTG CCAAGTGTG CTGTGGCAGG CCGTGGGGC CTGAGTCACA GCTGACGGG  
721 CCGCGCCCCG CTGCTT

1M-83 (left)

1 NGCTTGCCAA CCTACAGGTG GGGTCTTTCA GAAGTGGATG AGGCGGGCCG CGGAAGCGGG  
61 TGAAAATGGC CTGCGGGGAG CTGCTGTTCA GGCTGAGGGT CTCCAGGCG CCTGACTCCA  
121 ACCCCGAGTG ACTCCAGCCC CGGGCAAATG GGACTCGGAC TGCTTTGCCG CAGACTCAA  
181 ACTTGGGCGC CTGGGCTGAG CTCAGCACC CCCCTGGTG CCCAGTGGG CTCTGCGGTG  
241 CCGCCGTCTT GGGTTCCCCG GACATCTGTC CAGTGGTCGA CTCCCTTCT CAGGTGGGC  
301 CACAAAAACG GCCCCAAAAG TCCCTGGGAC GTCTCCAGG GTTGGGGCCG GGTGTTCAGA  
361 ACTCGTCAGT TCCACCACGG GTCCGCCAGA AANAGANCTA AGTTTAGAA

1M-83 (right)

1 GGTCTCTCT GAGTGATTGA CTACCCGTTA GCGGGGGCAT TTGGGGGCTC GTCCGGGATC  
61 GGGAGACCCC TGCCAGGGA CCACCGACCC ACCACCGGGA GGTAAGCTGG CTGCCTCGG  
121 CGTTTCGGTG ATGACGGTGA AAACCTCTGA CACATGCAGC TCCCGGAGAC GTTACAGCT  
181 TGTCTGTAAG CGGATGCCG GAGCAGACAA GCCCGTCAGG GCGCGTCAGC GGGTGTGGC  
241 GGGTGTGGG GCGCAGCCAT GACCCAGTCA CGTAGCGATA GCGGAGTGA CTGATAACTT  
301 CGTATAATGT ATGCTATACG AAGTTATTAG GTCTGAAGAG GAGTTTACGT CCAGGAGCGC  
361 ACCATCTCT TCAAGGACGA CGGCAACTAC AAGACCCGCG CCGAGGTGAA GTTCGATAAA  
421 ATAAAAGATT TTATTTAGTC TCCAGAAAAA GGGGGGAATG AAGACCCCC CCCCTGTAA  
481 A

1M-84 (left)

```

1 GNAACCTACA GGTGGGGTCT TTCA CAGAAC TAGGCAGGGT GGGTAGGGGA AGACCTCAAG
61 ACAATGGAGA GTGGGAAAAT AGACGCATTT AATATTAGAA GCATCAGAAA AAAAGGAAAA
121 CAACACATT TTTCCCCCTA GAACTACACA GGGAGGTGGG GGAGGAAGAT GGGGAAATAG
181 AAGGAGAAAC TGAATAAGGA CTTGTTTGG GGGAGATAAA AGGTATAAAG GACACAGAGG
241 TAAAGACGTT CCGGAAAGCT CTAGAGGAGC CGCCCTCTCC TGTCTCGTCA CCATTTTAA
301 AGGGATCTGA TCCTCGCAAT AGCTCTTGGT ATATGCTGGA GGTAATTGCC TAGATTCCC
361 GCGTTCCTGT CCTCTGCGAG TCTCTGGCT GTGACAGCCA CTGTGACTCT TCTGATGCAC
421 TTGTCAGTA GAGGACCGCG TGAGATGCAA ACACAAAATC AAGGGGCGCC TAATGTCTGA
481 CGAGGCGCAT TCCTGGGCGC AGTGGGAGCC TCGACTCCCT TCCTCAGGTC GGGCCACAAA
541 AACGGCCCCC AAAGTCCCTG GGACGTCTCC CAGGGTTGCG GCCGGGTGTT CAGAACTCGT
601 CAGTCCACC ACGGGTCCGC CAGACGGAGN GNNNTGGTTA AGAA

```

1M-84 (right)

```

1 GGAGGGTCTC CTCTGAGTGA TTGACTACCC ACGACGGGGG TCTTTCACTG TCACGTCCCT
61 TCTTCCCCTG TATCACAACA ATGTTCTCCC TTTCTACCT TTGTTTCTCT TCATACTGT
121 TTCTCTCTCT GTGTCTCTCT CATTCTCTT CCTTCCAAAT GTAGTATTG GAGACTGTAA
181 TATCGA TAAA ATAAAAGATT TTATTAGTC TCCAGAAAAA GGGGGGAATG AAAGANCCCC
241 CACCTGTANN

```

1M-89 (left)

```

1 NGCTGCCAAC CTACAGGTGG GGTCTTTCA CAGNACTTT GGGAGGCCGA GGCAGGTGGA
61 TCACAAGGTC AGGAGT TCGA CTCCCTTCT CAGGTCGGGC CACAAAAACG GCCCCCAAAG
121 TCCCTGGGAC GTCTCCCAGG GTTGCGGCCG GGTGTTTACA ACTCGTCAGT TCCACCACGG
181 GTCCGCCAGA TACAGAGCTA GTTAGCTAAC TAGTACAGAC GCAGGCGCAT AATNNCAAAC
241 ATAGA

```

1M-89 (right)

```

1 GGCINTCTTG GGAGGGTCTC CTCTGANTGA TTGNACTACC CACGACGGGG GTCTTTCACT
61 GGGATTACAA GTGTGAGCCA CGCGCCAGC CCACCTGGCT AATTTTGTG TTTTTCATAC
121 AGACGGGGT TCACCATGT GGCCGGCTGG TCTCGA TAAA ATAAAAGATT TTATTAGTC
181 TCCAGAAAAA GGGGGGAATG AAAGACCCCA CCTGTAGGTT TGGCAAGCTA GCTTAAGTAA
241 CGCCATTTG CAAGGCAAGN AA

```

**Figure 2.** Sequences of *DHFR*\* integration sites determined from inverse PCR products. Primary inverse PCR products (0.1-1  $\mu$ l) were used as a template in nested PCR under the same conditions, except secondary primers were used. The secondary primers used were Taq3, Taq3' (left PCR) and Taq 4 and Taq 4' (mixed PCR). Secondary PCR products were separated on a 1% agarose gel, purified using the QIAquick Gel Extraction Kit (Qiagen) and sequenced (sequencing primers Taq 3' and Taq 4). Sequences always contain part of the LTR sequence (yellow) followed by unique flanking genome sequence (green). Additionally, they sometimes contain the Taq $\alpha$ I restriction site (black) and vector sequence (yellow). Sequences were mapped on the human genome sequence using BLAT software (UCSC Genome Browser, May 2004 freeze).

Primer sequences:

```

Taq 1: CTA TGT TTG ATG TTA TGC GCC TGC
Taq 2: CTA ACT AGC TCT GTA TCT GGC GGA
Taq 3: AGA GAA CCA TCA GAT GTT TCC AGG
Taq 3': GCC TTG CAA AAT GGC GTT ACT T
Taq 4: AGT TGC ATC CGA CTT GTG GTC
Taq 4': ACA GGT GGG GTC TTT CAT TCC

```
